# Supplementary material for: Recurrent somatic mutations as predictors of immunotherapy response
Source: PubMed Central journal article supplement (PMC9270330; doi:10.1038/s41467-022-31055-3), 2022-07-08
Supplement: 41467_2022_31055_MOESM1_ESM.pdf [file 41467_2022_31055_MOESM1_ESM.pdf]

*Supplementary information*

**A robust predictor of immunotherapy response using whole exome sequencing**

Zoran Z. Gajic<sup>1,2,3</sup>, Aditya Deshpande<sup>1,4,5</sup>, Mateusz Legut<sup>1,2,3</sup>,  
Marcin Imielinski<sup>1,5,\*</sup>, Neville E. Sanjana<sup>1,2,3\*</sup>

<sup>1</sup> New York Genome Center, New York, NY 10013, USA.

<sup>2</sup> Department of Biology, New York University, New York, NY 10002, USA.

<sup>3</sup> Department of Neuroscience and Physiology, New York University School of Medicine, New York, NY 10016, USA.

<sup>4</sup> Tri-institutional Ph.D. Program in Computational Biology and Medicine, New York, NY.

<sup>5</sup> Department of Pathology and Laboratory Medicine, Englander Institute for Precision Medicine, Institute for Computational Biomedicine, and Meyer Cancer Center, Weill Cornell Medicine, New York, NY 10065, USA.

\*To whom correspondence should be addressed: Marcin Imielinski ([mimielinski@nygenome.org](mailto:mimielinski@nygenome.org)) and Neville Sanjana ([nsanjana@nygenome.org](mailto:nsanjana@nygenome.org)).

## **Supplementary Figures**

**Supplementary Figure 1.** High and moderate mutational subtypes are enriched in responders.

**Supplementary Figure 2.** Age, tumor mutational burden and tumor type for predictive genes.

**Supplementary Figure 3.** Tumor specificity of immunotherapy predictive genes.

**Supplementary Figure 4.** Pathway-level mutational analysis of immunotherapy response.

**Supplementary Figure 5.** Additional analyses of the CIRCLE classifier and feature set.

**Supplementary Figure 6.** CIRCLE classifications do not predict survival in cancer patients from the TCGA PanCancer Atlas.

**Supplementary Figure 7.** Performance of the CIRCLE classifier on validation cohorts.

## **Supplementary Tables**

**Supplementary Table 1.** Mutation calling pipelines for each cohort.

**Supplementary Table 2.** Studies included in the meta-analysis.

**Supplementary Table 3.** Mutational classes in each study.

**Supplementary Table 4.** Regression significant pathways.

**Supplementary Table 5.** Significant pathways after removal of duplicate pathways.

**Supplementary Table 6.** Significant pathways that overlap a CRISPR genome-scale screen.

**Supplementary Table 7.** CIRCLE logistic regression coefficients.

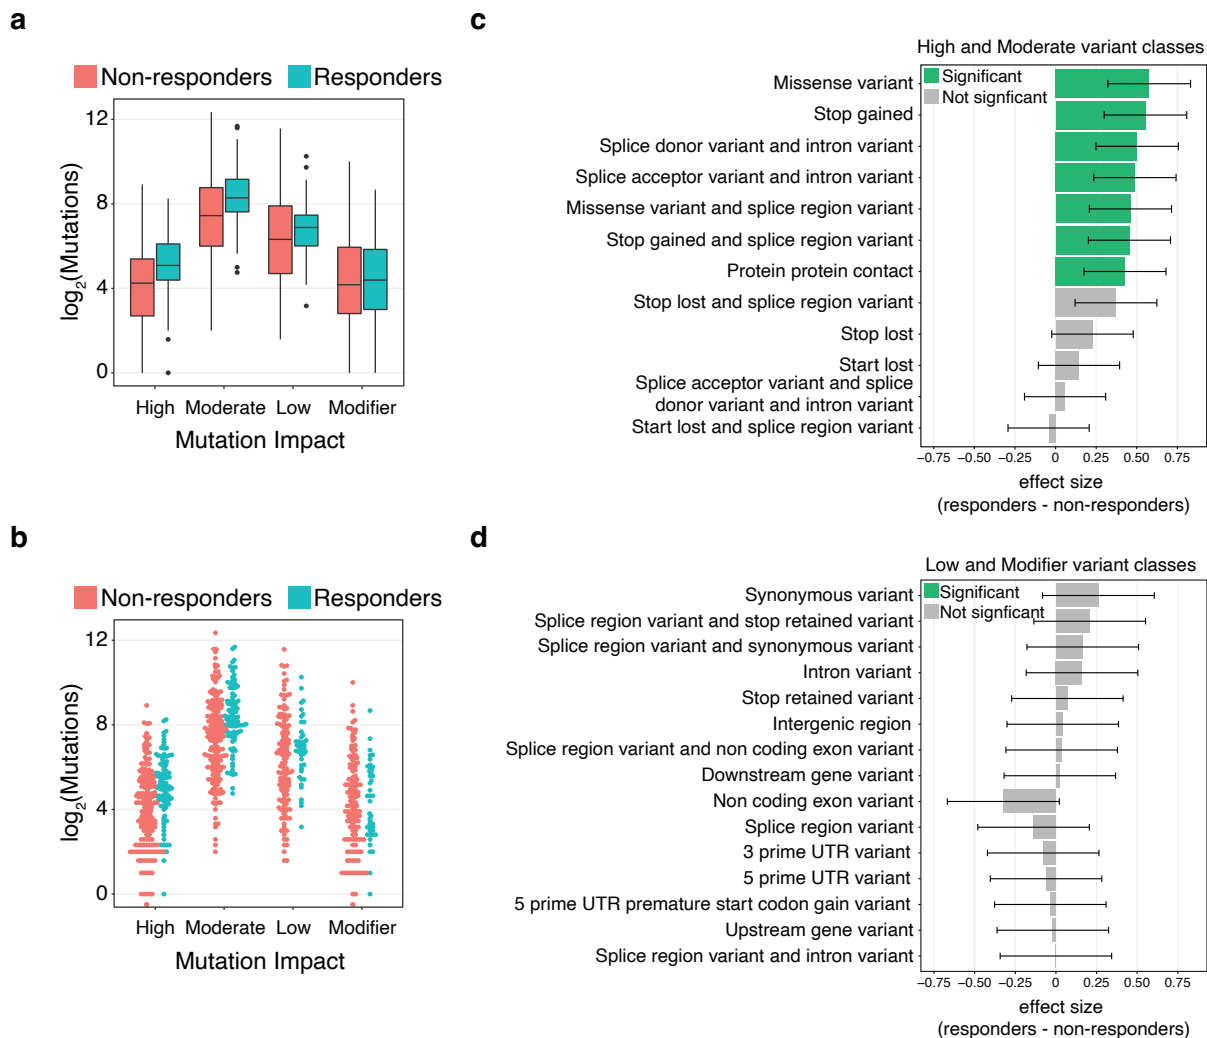

### Supplementary Figure 1. High and moderate mutational subtypes are enriched in responders.

(a – b) Boxplot (a) and beeswarm plot (b) of the number of mutations per patient ( $n = 272$  patients) for High, Moderate, Low, and Modifier mutations. The middle line of the box indicates the 50<sup>th</sup> percentile of data, box boundaries are defined as the 25<sup>th</sup>, and 75<sup>th</sup> percentile of the data, and whiskers are defined as the more extreme of the maximum/minimum value or 1.5 times the interquartile range.

(c - d) Standardized difference of means ( $g$ -statistic) of log<sub>2</sub> TMB per patient ( $n = 272$  patients) between responders and non-responders for the *High* and *Moderate* (c) and *Low* and *Modifier* (d) SnpEff mutation categories. Significance was determined using a two-sided Welch’s t-test with Bonferroni correction. Significant mutation categories are shown in *green* and non-significant categories are shown in *grey*. Error bars indicate the 95% confidence interval of each effect size.

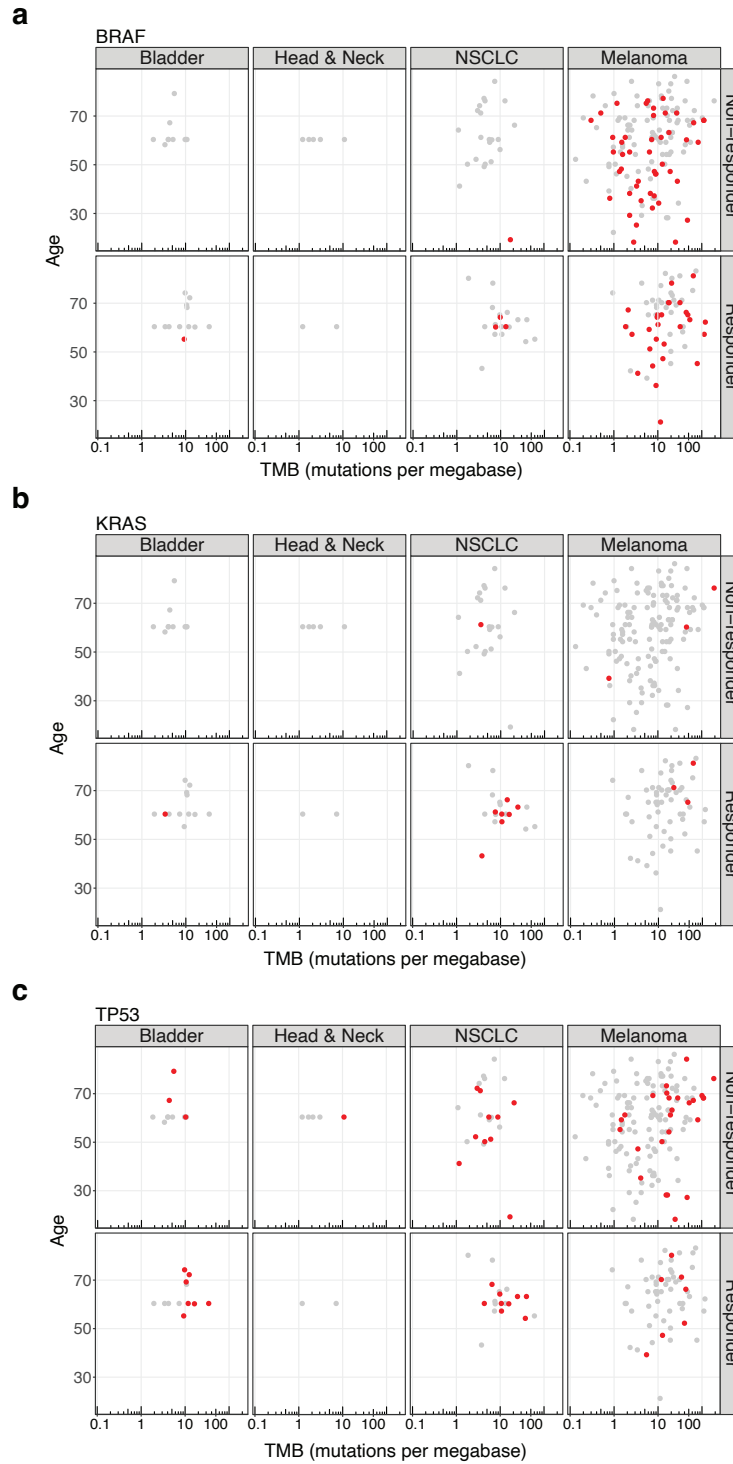

**Supplementary Figure 2. Age, tumor mutational burden and tumor type for predictive genes.**

(a - c) *BRAF* (a), *KRAS* (b), and *TP53* (c) mutations in the combined cohort with age, TMB and tumor type of the patients where they were identified. Patients with mutations in these genes are highlighted in *red*.

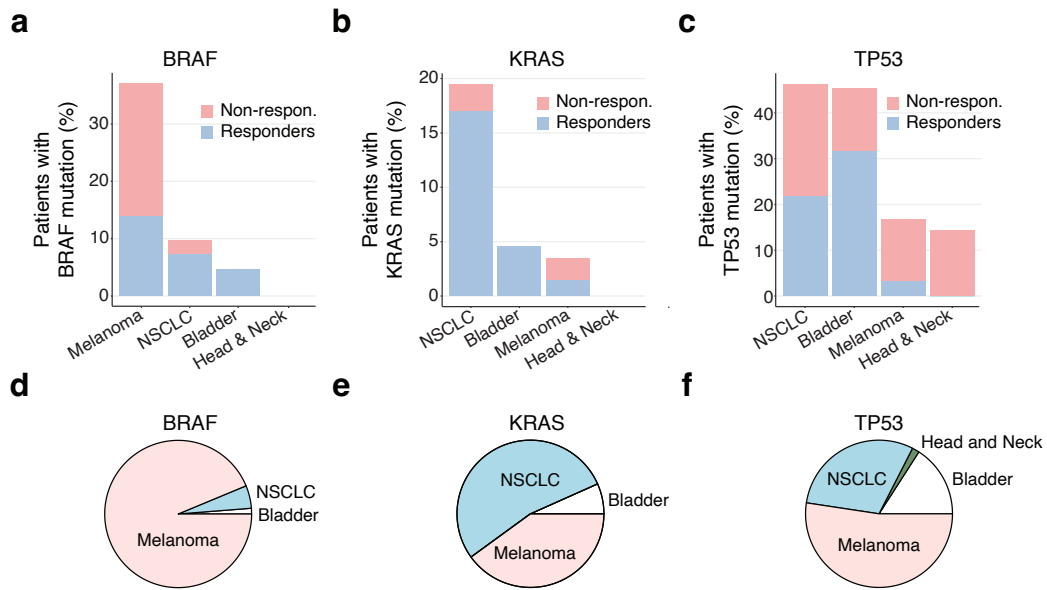

**Supplementary Figure 3. Tumor specificity of immunotherapy predictive genes.**

**(a - c)** Prevalence of *BRAF* **(a)**, *KRAS* **(b)**, and *TP53* **(c)** mutations in responders (*blue*) and non-responders (*red*) across the four tumor types.

**(d - f)** Distribution of *BRAF* **(d)**, *KRAS* **(e)**, and *TP53* **(f)** mutations across patients in the immunotherapy cohort.

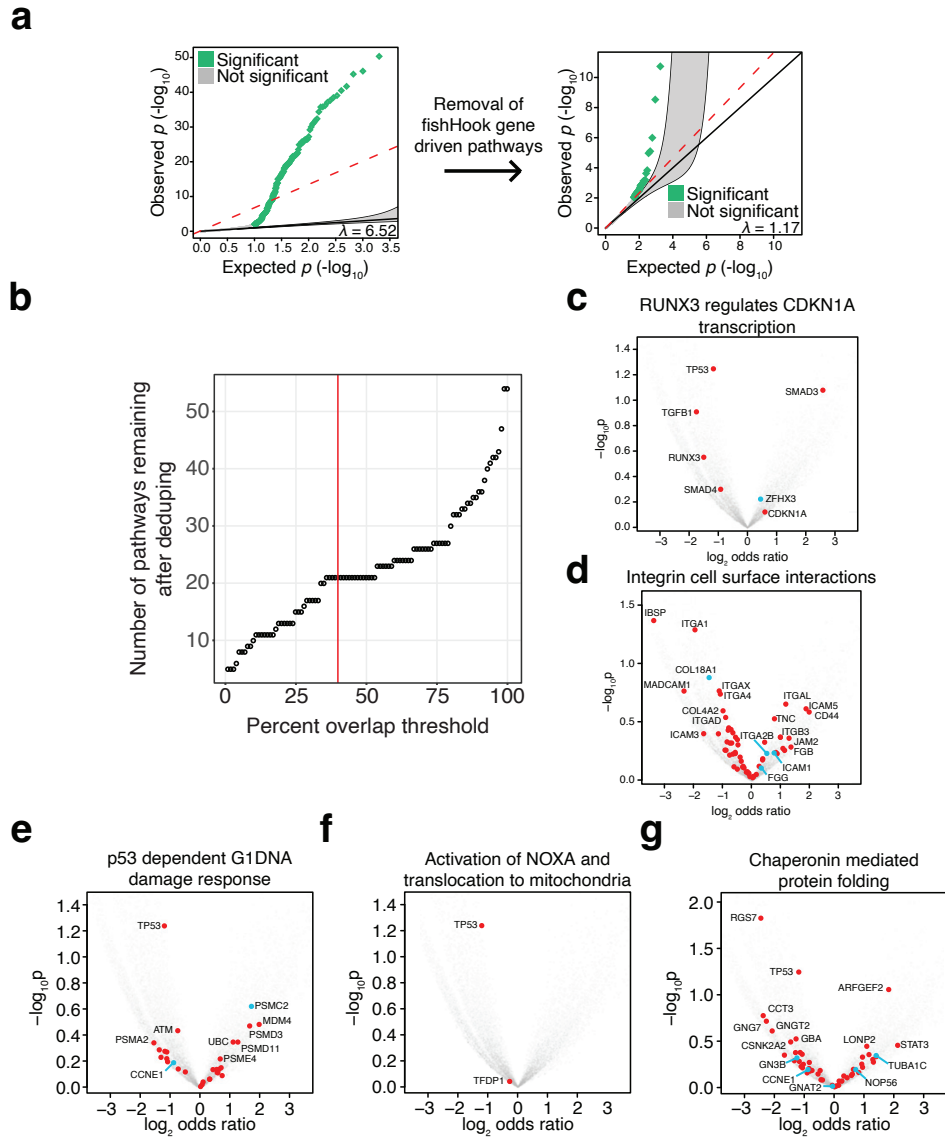

### Supplementary Figure 4. Pathway-level mutational analysis of immunotherapy response.

(a) Quantile-quantile plot of fishHook nominated pathways before and after removal of pathway signals driven by the significant genes. The red dashed line indicates the slope of the regression line ( $\lambda$ ). The shaded area indicates the 95% confidence interval for the null distribution. The  $p$ -values were obtained by comparing observed mutational rate to the right tail (one-sided) of the expected mutational rates derived from a gamma-Poisson model of genome-wide mutational density and the covariates replication timing, epigenetic state, and sequence context.

(b) In order to select an appropriate threshold for pathway de-duplication (due to gene overlap), we ordered the nominated pathways by significance and excluded pathways that shared a percentage of genes greater than 40%.

(c – g) Volcano plots of genes within five of the predictive pathways: *RUNX3 Regulates CDKN1A Transcription* (c), *Integrin Cell Surface Interactions* (d), *p53 Dependent G1 DNA Damage*

*Response (e), Activation of NOXA and Translocation to Mitochondria (f), and Chaperonin Mediated Protein Folding (g). Blue highlighting indicates genes that were also found in the CRISPR screen. The  $p$ -values were obtained by comparing observed mutational rate to the right tail (one-sided) of the expected mutational rates derived from a gamma-Poisson model of genome-wide mutational density and the covariates replication timing, epigenetic state, and sequence context.*

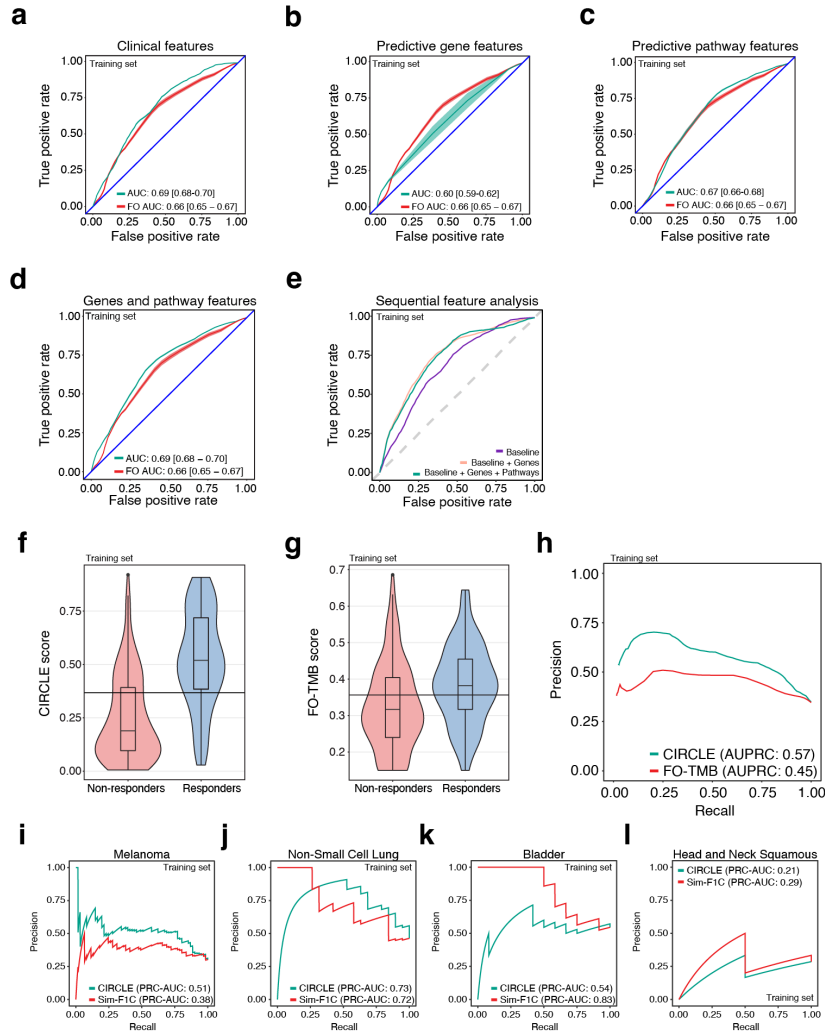

### Supplementary Figure 5. Additional analyses of the CIRCLE classifier and feature set.

(a - d) Mean receiver-operator characteristic (ROC) curves for each of the tested sub-CIRCLE feature sets: clinical features (a), predictive genes (b), predictive pathways (c), predictive genes and pathways (d). Error bars indicate the standard deviation over 100 Monte-Carlo cross validation iterations.

(e) Mean ROC curves for sequentially tested feature sets including Clinical features only (purple), Clinical features and Genes (beige), and Clinical features, Genes, and Pathways – CIRCLE (blue).

(f - g) Distribution of CIRCLE (f), and FO-TMB scores (g) for true responders (blue,  $n = 94$  patients) and true non-responders (red,  $n = 178$  patients). The horizontal black line indicates the optimized threshold chosen from ROC analysis. The middle line of the box indicates the 50<sup>th</sup> percentile of data, box boundaries are defined as the 25<sup>th</sup>, and 75<sup>th</sup> percentile of the data, and whiskers are defined as the more extreme of the maximum/minimum value or 1.5 times the interquartile range.

(h) Mean precision recall curves for CIRCLE (blue) and FO-TMB (red) across the 100 Monte-Carlo cross validation iterations.



**(i-l)** Precision recall curves for CIRCLE (*blue*) and FO-TMB (*red*) in melanoma **(i)**, NSCLC **(j)**, bladder cancer **(k)**, and head and neck squamous cancer **(l)**.

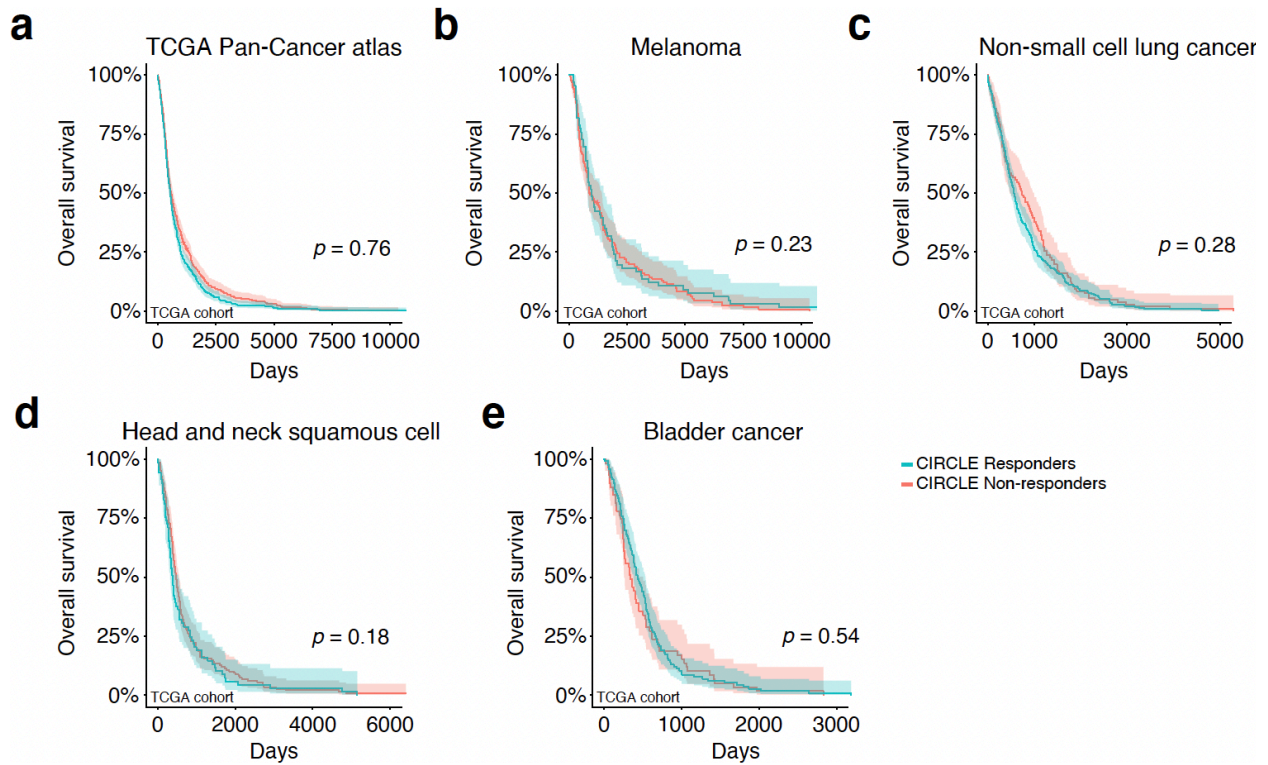

**Supplementary Figure 6. CIRCLE classifications do not predict survival in cancer patients from the TCGA PanCancer Atlas.**

(a - e) Kaplan-Meier plots TCGA PanCancer atlas patients classified as either CIRCLE responders or non-responders in the a cohort containing melanoma, NSLCLC, head and neck squamous cell and bladder cancer patients (a), melanoma patients only (b), NSCLC patients only (c), head and neck squamous cell patients only (d), and bladder cancer patients only (e). Shaded areas indicate the 95% confidence interval. The  $p$ -values were calculated using a two-sided Cox proportional hazards test with tumor type, age, stage, and *TP53* mutational status as covariates.

**a**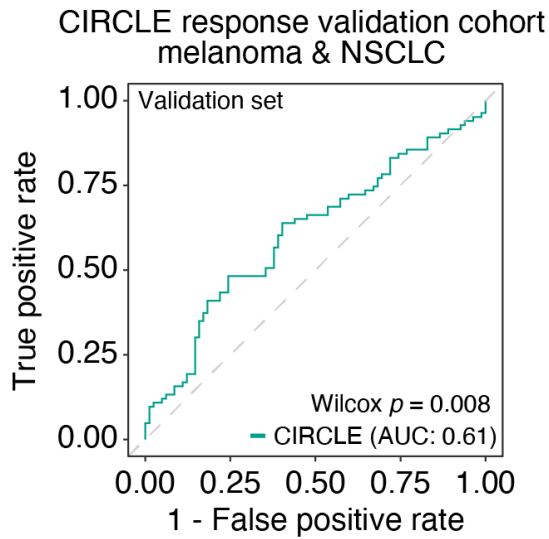**b**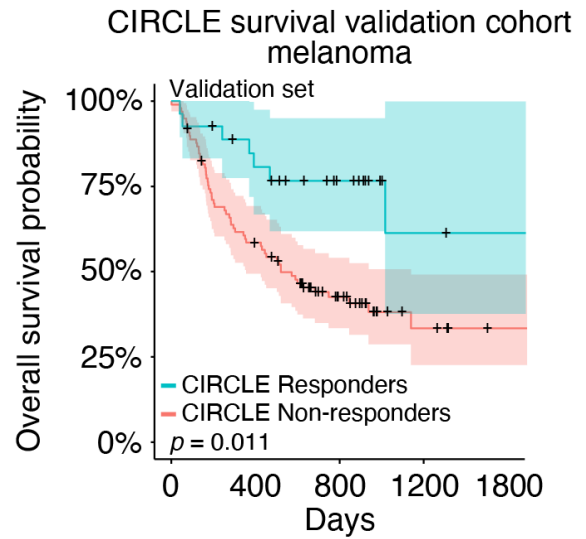

**Supplementary Figure 7. Performance of the CIRCLE classifier on validation cohorts.**

**(a)** Receiver-operator characteristic (ROC) curve for the CIRCLE model on a novel validation cohort containing melanoma ( $n = 124$ ) and non-small cell lung cancer ( $n = 41$ ) WES with matched ICB response status. Significance was calculated using a two-sided Wilcoxon test.

**(b)** Kaplan-Meier plot of overall survival for validation patients classified as CIRCLE responders versus CIRCLE non-responders. Shaded areas indicate the 95% confidence interval. Statistical significance was calculated using a two-sided Cox proportional hazards test with Tumor Type (melanoma/non-small cell lung cancer) as a covariate.

**Supplementary Table 1. Mutation calling pipelines for each cohort.**

| <b>Study</b>          | <b>Capture strategy</b>   | <b>Sequencing Platform</b> | <b>Aligner</b> | <b>Mutation caller (SNV)</b>             | <b>Quality control</b> |
|-----------------------|---------------------------|----------------------------|----------------|------------------------------------------|------------------------|
| Snyder et al. 2014    | Agilent (Exon 44 or 51MB) | HiSeq 2000                 | BWA            | Somatic Sniper                           | GATK                   |
| Rizvi et al. 2015     | Agilent (Exon 44)         | HiSeq 2000                 | BWA            | Somatic Sniper, Varscan, Strelka, MuTect | GATK                   |
| Van Allen et al. 2015 | Agilent V2 (44MB)         | HiSeq 2000                 | Picard         | MuTect                                   | FireHose QC            |
| Hugo et al. 2016      | <i>Not given</i>          | HiSeq 2000                 | NovoAlign      | UG, Varscan2, MuTect, Oncotator          | GATK, Samtools, Picard |
| Roh et al. 2017       | Agilent Sure Select XT    | HiSeq 2000/2500            | BWA            | MuTect                                   | Picard, GATk           |
| Miao et al. 2018      | Agilent V2 (44MB)         | HiSeq 2000                 | Picard         | MuTect                                   | FireHose QC            |
| Hellman et al. 2019   | Agilent (Exon 44 or 51MB) | HiSeq 2000/2500/4000       | BWA            | MuTect                                   | Picard, GATK           |
| Liu et al. 2019       | Illumina                  | HiSeq 2000/2500            | Picard         | MuTect                                   | FireHose QC            |

**Supplementary Table 2. Studies included in the meta-analysis.**

| Cohort                              | Number of Patients | Complete Response (%) | Partial Response (%) | Stable Disease (%) | Progressive Disease (%) | Age (Average) | Male (%) | Female (%) | Mutations Per Eligible MB (Average) | Tumor Type(s)                                   |
|-------------------------------------|--------------------|-----------------------|----------------------|--------------------|-------------------------|---------------|----------|------------|-------------------------------------|-------------------------------------------------|
| Snyder et al., 2014                 | 32                 | 0                     | 56                   | 0                  | 44                      | 60            | 72       | 28         | 20.8                                | Melanoma                                        |
| Van Allen et al., 2015              | 105                | 3                     | 13                   | 11                 | 72                      | 58            | 71       | 29         | 25.4                                | Melanoma                                        |
| Rizvi et al., 2015                  | 33                 | 0                     | 36                   | 30                 | 33                      | 62            | 45       | 55         | 8.9                                 | Lung                                            |
| Hugo et al., 2016                   | 38                 | 18                    | 37                   | 0                  | 45                      | 61            | 71       | 29         | 21.5                                | Melanoma, Lung                                  |
| Roh et al., 2017: anti-CTLA4 cohort | 19                 | 0                     | 11                   | 0                  | 89                      | 59            | 63       | 37         | 42.5                                | Melanoma                                        |
| Roh et al., 2017: anti-PD1 cohort   | 14                 | 0                     | 0                    | 14                 | 86                      | 52            | 57       | 43         | 38.8                                | Melanoma                                        |
| Miao et al., 2018                   | 78                 | 5                     | 26                   | 29                 | 40                      | 63            | 56       | 44         | 11.7                                | Bladder, Lung, Head and Neck Squamous, Melanoma |

*Numbers in this table are rounded to the nearest whole or tenth of a number and thus percentiles may not sum to 100.*

**Supplementary Table 3. Mutational classes in each study.**

| Cohort                              | Number of Patients in Study | Total High Mutations | High Mutations per Patient | Total Moderate Mutations | Moderate Mutations per Patient | Total Low Mutations | Low Mutations per Patient | Total Modifier Mutations | Modifier Mutations per Patient | Included in Low and Modifier Analysis |
|-------------------------------------|-----------------------------|----------------------|----------------------------|--------------------------|--------------------------------|---------------------|---------------------------|--------------------------|--------------------------------|---------------------------------------|
| Snyder et al., 2014                 | 32                          | 1648                 | 51.50                      | 18620                    | 581.88                         | 47                  | 1.47                      | 20                       | 0.62                           | No                                    |
| Rizvi et al., 2015                  | 23                          | 832                  | 36.17                      | 8069                     | 350.83                         | 15                  | 0.65                      | 11                       | 0.48                           | No                                    |
| Van Allen et al., 2015              | 93                          | 4249                 | 45.69                      | 43297                    | 465.56                         | 24525               | 263.71                    | 9311                     | 100.12                         | Yes                                   |
| Hugo et al., 2016                   | 38                          | 2114                 | 55.63                      | 22264                    | 585.89                         | 211                 | 5.55                      | 364                      | 9.58                           | No                                    |
| Roh et al., 2017: anti-CTLA4 cohort | 19                          | 1390                 | 73.16                      | 14168                    | 745.68                         | 8211                | 432.16                    | 859                      | 45.21                          | Yes                                   |
| Roh et al., 2017: anti-PD1 cohort   | 12                          | 862                  | 71.83                      | 9609                     | 800.75                         | 5466                | 455.50                    | 625                      | 52.08                          | Yes                                   |
| Miao et al., 2018                   | 55                          | 2121                 | 38.56                      | 17226                    | 313.20                         | 7709                | 140.16                    | 810                      | 14.73                          | Yes                                   |

**Supplementary Table 4. Regression significant pathways.**

| Pathway                                                                                                                              | Logistic Coefficient | OR     | 2.5 % CI | 97.5 % CI | p-value | Standard Error |
|--------------------------------------------------------------------------------------------------------------------------------------|----------------------|--------|----------|-----------|---------|----------------|
| MAP2K and MAPK activation                                                                                                            | 1.6580               | 5.2470 | 1.9630   | 16.4730   | 0.0020  | 0.5360         |
| Paradoxical activation of RAF signaling by kinase inactive BRAF                                                                      | 1.5730               | 4.8210 | 1.8370   | 14.7240   | 0.0030  | 0.5240         |
| RAF activation                                                                                                                       | 1.4310               | 4.1830 | 1.7090   | 11.3870   | 0.0030  | 0.4790         |
| Signaling by FGFR2                                                                                                                   | 2.0230               | 7.5630 | 2.3870   | 31.1610   | 0.0020  | 0.6430         |
| Signaling by high-kinase activity BRAF mutants                                                                                       | 1.6950               | 5.4480 | 2.0490   | 17.0230   | 0.0010  | 0.5330         |
| Signaling by moderate kinase activity BRAF mutants                                                                                   | 1.5730               | 4.8210 | 1.8370   | 14.7240   | 0.0030  | 0.5240         |
| DNA Damage/Telomere Stress Induced Senescence                                                                                        | -1.1630              | 0.3130 | 0.1370   | 0.6770    | 0.0040  | 0.4060         |
| Negative regulation of MAPK pathway                                                                                                  | 1.2010               | 3.3220 | 1.4080   | 8.4970    | 0.0080  | 0.4550         |
| Signaling by FGFR3                                                                                                                   | 1.3000               | 3.6690 | 1.4630   | 10.3540   | 0.0080  | 0.4940         |
| Signaling by FGFR4                                                                                                                   | 1.3040               | 3.6830 | 1.4580   | 10.4550   | 0.0090  | 0.4970         |
| Negative feedback regulation of MAPK pathway                                                                                         | 0.9700               | 2.6380 | 1.2710   | 5.6230    | 0.0100  | 0.3780         |
| Signaling by FGFR                                                                                                                    | 1.6350               | 5.1320 | 1.5510   | 21.4310   | 0.0130  | 0.6590         |
| p53-Dependent G1 DNA Damage Response                                                                                                 | -0.9450              | 0.3890 | 0.1770   | 0.8210    | 0.0150  | 0.3900         |
| p53-Dependent G1/S DNA damage checkpoint                                                                                             | -0.9450              | 0.3890 | 0.1770   | 0.8210    | 0.0150  | 0.3900         |
| Activated NTRK2 signals through FRS2 and FRS3                                                                                        | 0.8220               | 2.2760 | 1.1270   | 4.6980    | 0.0230  | 0.3620         |
| Activated NTRK2 signals through RAS                                                                                                  | 0.8060               | 2.2380 | 1.1070   | 4.6250    | 0.0260  | 0.3630         |
| Integrin cell surface interactions                                                                                                   | 1.2780               | 3.5890 | 1.2540   | 11.1810   | 0.0210  | 0.5530         |
| Signaling by NTRK2 (TRKB)                                                                                                            | 0.8580               | 2.3580 | 1.1150   | 5.1410    | 0.0270  | 0.3880         |
| Signaling by PDGF                                                                                                                    | 1.1940               | 3.2990 | 1.2270   | 9.8590    | 0.0230  | 0.5260         |
| Stabilization of p53                                                                                                                 | -0.8450              | 0.4300 | 0.1980   | 0.8970    | 0.0280  | 0.3830         |
| TP53 Regulates Transcription of Cell Death Genes                                                                                     | -0.8970              | 0.4080 | 0.1800   | 0.8840    | 0.0270  | 0.4050         |
| TP53 regulates transcription of several additional cell death genes whose specific roles in p53-dependent apoptosis remain uncertain | -0.8660              | 0.4210 | 0.1940   | 0.8750    | 0.0240  | 0.3830         |
| Transcriptional activation of cell cycle inhibitor p21                                                                               | -0.9770              | 0.3760 | 0.1600   | 0.8430    | 0.0210  | 0.4220         |
| Transcriptional activation of p53 responsive genes                                                                                   | -0.9770              | 0.3760 | 0.1600   | 0.8430    | 0.0210  | 0.4220         |
| Signalling to ERKs                                                                                                                   | 1.0100               | 2.7460 | 1.1370   | 7.1700    | 0.0300  | 0.4660         |
| TP53 Regulates Transcription of Caspase Activators and Caspases                                                                      | -0.8500              | 0.4280 | 0.1900   | 0.9190    | 0.0340  | 0.4000         |
| Formation of Senescence-Associated Heterochromatin Foci (SAHF)                                                                       | -0.7730              | 0.4620 | 0.2160   | 0.9520    | 0.0410  | 0.3770         |

|                                                                        |         |        |        |         |        |        |
|------------------------------------------------------------------------|---------|--------|--------|---------|--------|--------|
| RUNX3 regulates CDKN1A transcription                                   | -0.7920 | 0.4530 | 0.2090 | 0.9470  | 0.0390 | 0.3840 |
| Signaling by NTRKs                                                     | 1.1900  | 3.2880 | 1.0910 | 11.6290 | 0.0450 | 0.5950 |
| Signaling by FGFR1                                                     | 0.9780  | 2.6590 | 1.0480 | 7.4080  | 0.0480 | 0.4940 |
| Activation of NMDA receptor and postsynaptic events                    | 0.9000  | 2.4600 | 1.0100 | 6.3610  | 0.0530 | 0.4660 |
| VEGFA-VEGFR2 Pathway                                                   | 0.9290  | 2.5320 | 1.0080 | 6.8080  | 0.0550 | 0.4840 |
| Activation of NOXA and translocation to mitochondria                   | -0.7770 | 0.4600 | 0.2010 | 1.0100  | 0.0590 | 0.4110 |
| Activation of PUMA and translocation to mitochondria                   | -0.7110 | 0.4910 | 0.2260 | 1.0300  | 0.0660 | 0.3860 |
| Assembly of collagen fibrils and other multimeric structures           | 1.0860  | 2.9640 | 0.9910 | 9.7910  | 0.0600 | 0.5770 |
| CD28 dependent Vav1 pathway                                            | -0.7640 | 0.4660 | 0.2020 | 1.0340  | 0.0660 | 0.4150 |
| Cell surface interactions at the vascular wall                         | 0.9690  | 2.6360 | 0.9820 | 7.7030  | 0.0630 | 0.5210 |
| Signaling by FGFR2 in disease                                          | 0.6900  | 1.9940 | 0.9630 | 4.2120  | 0.0650 | 0.3750 |
| TP53 Regulates Transcription of Genes Involved in G1 Cell Cycle Arrest | -0.7160 | 0.4890 | 0.2220 | 1.0400  | 0.0690 | 0.3930 |
| Chaperonin-mediated protein folding                                    | -0.7700 | 0.4630 | 0.1930 | 1.0700  | 0.0770 | 0.4350 |
| Collagen chain trimerization                                           | 1.0180  | 2.7670 | 0.9150 | 9.2410  | 0.0810 | 0.5830 |
| Collagen formation                                                     | 1.1580  | 3.1830 | 0.9510 | 12.8240 | 0.0750 | 0.6510 |
| PI3P Regulates TP53 Acetylation                                        | -0.7080 | 0.4930 | 0.2190 | 1.0660  | 0.0780 | 0.4020 |
| Regulation of TP53 Expression                                          | -0.7360 | 0.4790 | 0.2080 | 1.0580  | 0.0750 | 0.4130 |
| Scavenging by Class A Receptors                                        | -0.7380 | 0.4780 | 0.2050 | 1.0820  | 0.0810 | 0.4230 |
| Autodegradation of the E3 ubiquitin ligase COP1                        | -0.6550 | 0.5200 | 0.2430 | 1.0760  | 0.0840 | 0.3780 |
| FMO oxidises nucleophiles                                              | 0.7450  | 2.1060 | 0.8970 | 5.0320  | 0.0890 | 0.4380 |
| Protein folding                                                        | -0.7530 | 0.4710 | 0.1930 | 1.1130  | 0.0910 | 0.4450 |
| Regulation of TP53 Activity through Association with Co-factors        | -0.6550 | 0.5200 | 0.2420 | 1.0790  | 0.0850 | 0.3810 |
| Signaling by BRAF and RAF fusions                                      | 0.8910  | 2.4380 | 0.8990 | 7.3350  | 0.0920 | 0.5300 |
| Signaling by NTRK1 (TRKA)                                              | 0.8980  | 2.4550 | 0.9040 | 7.4310  | 0.0910 | 0.5310 |
| Collagen biosynthesis and modifying enzymes                            | 1.0160  | 2.7630 | 0.8620 | 10.0400 | 0.1000 | 0.6170 |
| Signaling by the B Cell Receptor (BCR)                                 | 0.7650  | 2.1500 | 0.8760 | 5.5200  | 0.1010 | 0.4660 |
| Signaling by FGFR4 in disease                                          | 0.5700  | 1.7690 | 0.8890 | 3.5530  | 0.1050 | 0.3520 |

Pathway p-values were calculated as described in the Gene nomination section of the Methods.



**Supplementary Table 5. Significant pathways after removal of duplicate pathways.**

| Pathway                                                         | Logistic Coefficient | OR     | 2.5 % CI | 97.5 % CI | p-value | Standard Error |
|-----------------------------------------------------------------|----------------------|--------|----------|-----------|---------|----------------|
| MAP2K and MAPK activation                                       | 1.6580               | 5.2470 | 1.9630   | 16.4730   | 0.0020  | 0.5360         |
| Signaling by FGFR2                                              | 2.0230               | 7.5630 | 2.3870   | 31.1610   | 0.0020  | 0.6430         |
| DNA Damage/Telomere Stress Induced Senescence                   | -1.1630              | 0.3130 | 0.1370   | 0.6770    | 0.0040  | 0.4060         |
| Negative regulation of MAPK pathway                             | 1.2010               | 3.3220 | 1.4080   | 8.4970    | 0.0080  | 0.4550         |
| p53-Dependent G1 DNA Damage Response                            | -0.9450              | 0.3890 | 0.1770   | 0.8210    | 0.0150  | 0.3900         |
| Integrin cell surface interactions                              | 1.2780               | 3.5890 | 1.2540   | 11.1810   | 0.0210  | 0.5530         |
| Signaling by PDGF                                               | 1.1940               | 3.2990 | 1.2270   | 9.8590    | 0.0230  | 0.5260         |
| TP53 Regulates Transcription of Cell Death Genes                | -0.8970              | 0.4080 | 0.1800   | 0.8840    | 0.0270  | 0.4050         |
| Signalling to ERKs                                              | 1.0100               | 2.7460 | 1.1370   | 7.1700    | 0.0300  | 0.4660         |
| RUNX3 regulates CDKN1A transcription                            | -0.7920              | 0.4530 | 0.2090   | 0.9470    | 0.0390  | 0.3840         |
| Activation of NMDA receptor and postsynaptic events             | 0.9000               | 2.4600 | 1.0100   | 6.3610    | 0.0530  | 0.4660         |
| Activation of NOXA and translocation to mitochondria            | -0.7770              | 0.4600 | 0.2010   | 1.0100    | 0.0590  | 0.4110         |
| Assembly of collagen fibrils and other multimeric structures    | 1.0860               | 2.9640 | 0.9910   | 9.7910    | 0.0600  | 0.5770         |
| CD28 dependent Vav1 pathway                                     | -0.7640              | 0.4660 | 0.2020   | 1.0340    | 0.0660  | 0.4150         |
| Cell surface interactions at the vascular wall                  | 0.9690               | 2.6360 | 0.9820   | 7.7030    | 0.0630  | 0.5210         |
| Chaperonin-mediated protein folding                             | -0.7700              | 0.4630 | 0.1930   | 1.0700    | 0.0770  | 0.4350         |
| PI5P Regulates TP53 Acetylation                                 | -0.7080              | 0.4930 | 0.2190   | 1.0660    | 0.0780  | 0.4020         |
| Regulation of TP53 Expression                                   | -0.7360              | 0.4790 | 0.2080   | 1.0580    | 0.0750  | 0.4130         |
| Scavenging by Class A Receptors                                 | -0.7380              | 0.4780 | 0.2050   | 1.0820    | 0.0810  | 0.4230         |
| FMO oxidises nucleophiles                                       | 0.7450               | 2.1060 | 0.8970   | 5.0320    | 0.0890  | 0.4380         |
| Regulation of TP53 Activity through Association with Co-factors | -0.6550              | 0.5200 | 0.2420   | 1.0790    | 0.0850  | 0.3810         |

Pathway p-values were calculated as described in the Gene nomination section of the Methods.

**Supplementary Table 6. Significant pathways that overlap a CRISPR genome-scale screen.**

| Pathway                                                         | Number of Overlapping Genes | q-value | Overlapping Genes                                                    |
|-----------------------------------------------------------------|-----------------------------|---------|----------------------------------------------------------------------|
| p53-Dependent G1 DNA Damage Response                            | 10                          | 0.00026 | PSMB5, PSMA6, PSMC2, PSMD7, PSMA5, UBA52, PSMB2, PSMA7, CCNE1, PSMB4 |
| Activation of NOXA and translocation to mitochondria            | 2                           | 0.00477 | PMAIP1, E2F1                                                         |
| Scavenging by Class A Receptors                                 | 3                           | 0.01882 | CALR, APOE, COLEC12                                                  |
| Integrin cell surface interactions                              | 6                           | 0.02790 | ICAM1, ITGA2B, FGG, ITGB1, COL18A1, VTN                              |
| Chaperonin-mediated protein folding                             | 7                           | 0.04908 | GNB3, CSNK2B, TUBA1C, GNAT2, CCNE1, NOP56, TUBB2B                    |
| RUNX3 regulates CDKN1A transcription                            | 1                           | 0.05872 | ZFHX3                                                                |
| MAP2K and MAPK activation                                       | 3                           | 0.08057 | BRAF, ITGA2B, FGG                                                    |
| DNA Damage/Telomere Stress Induced Senescence                   | 4                           | 0.10003 | HIST1H2BO, CCNE1, HIST1H2BK, H2AFV                                   |
| Regulation of TP53 Activity through Association with Co-factors | 1                           | 0.10872 | AKT3                                                                 |
| Signalling to ERKs                                              | 2                           | 0.10872 | CRKL, BRAF                                                           |
| Negative regulation of MAPK pathway                             | 2                           | 0.15750 | BRAF, UBA52                                                          |
| TP53 Regulates Transcription of Cell Death Genes                | 2                           | 0.18393 | PMAIP1, CASP2                                                        |
| Signaling by FGFR2                                              | 3                           | 0.20444 | BRAF, FGF4, UBA52                                                    |
| Signaling by PDGF                                               | 2                           | 0.20444 | CRKL, STAT1                                                          |
| Assembly of collagen fibrils and other multimeric structures    | 2                           | 0.22342 | COL5A1, COL18A1                                                      |
| Activation of NMDA receptor and postsynaptic events             | 1                           | 0.23980 | BRAF                                                                 |
| Cell surface interactions at the vascular wall                  | 3                           | 0.52534 | CD58, ITGB1, TEK                                                     |

Pathway q-values were calculated as using a one-sided hypergeometric test.

**Supplementary Table 7. CIRCLE logistic regression coefficients.**

| CIRCLE Variable                                      | Coefficient | Standard Error | z-score | p-value  |
|------------------------------------------------------|-------------|----------------|---------|----------|
| Intercept                                            | -5.21       | 1.29           | -4.03   | 5.48e-05 |
| BCLAF1                                               | -1.65       | 0.56           | -2.96   | 3.12e-03 |
| BRAF                                                 | 0.71        | 0.39           | 1.83    | 6.78e-02 |
| KRAS                                                 | 1.00        | 0.72           | 1.39    | 1.65e-01 |
| TP53                                                 | 0.19        | 1.05           | 0.19    | 8.53e-01 |
| Activation of NOXA and translocation to mitochondria | -0.50       | 0.84           | -0.59   | 5.55e-01 |
| Chaperonin mediated protein folding                  | -0.11       | 0.41           | -0.26   | 7.94e-01 |
| Integrin cell surface interactions                   | 1.02        | 0.48           | 2.12    | 3.39e-02 |
| MAP2K and MAPK activation                            | 1.38        | 0.48           | 2.89    | 3.84e-03 |
| RUNX3 regulates CDKN1A transcription                 | 0.21        | 0.56           | 0.37    | 7.10e-01 |
| Scavenging by Class A Receptors                      | -0.73       | 0.38           | -1.91   | 5.65e-02 |
| p53 Dependent G1 DNA Damage Response                 | -0.84       | 0.42           | -2.01   | 4.47e-02 |
| Age                                                  | 0.03        | 0.01           | 1.97    | 4.91e-02 |
| TMB                                                  | 0.46        | 0.17           | 2.81    | 4.97e-03 |
| Tumor Type: Head and Neck Squamous                   | -0.54       | 1.04           | -0.52   | 6.05e-01 |
| Tumor Type: Lung                                     | -0.86       | 0.64           | -1.34   | 1.80e-01 |
| Tumor Type: Melanoma                                 | -2.22       | 0.63           | -3.53   | 4.22e-04 |

p-values were calculated using a two-tailed Wald's test of logistic regression coefficients.
