# Supplementary material for: Recurrent somatic mutations as predictors of immunotherapy response
Source: PubMed Central journal article supplement (PMC9270330; doi:10.1038/s41467-022-31055-3), 2022-07-08
Supplement: 41467_2022_31055_MOESM2_ESM.pdf [file 41467_2022_31055_MOESM2_ESM.pdf]

## **Description of Additional Supplementary Files**

File Name: Supplementary Data 1

Description: A excel file containing access data and sample information for samples used to create the replication timing, and epigenetic covariates.
